# Supplementary material
Source: Springer Nature journal article supplement (https://www.springermedizin.de/resource/supplementary/12890_2013_452_MOESM1_ESM.pdf/9505250)

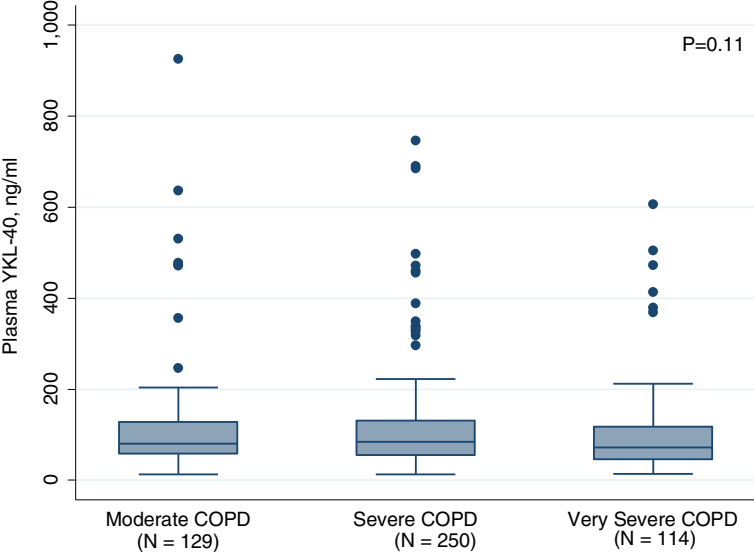

Supplement: MOESM1 [file 9505250]
